# Supplementary material for: Vertically aligned carbon nanofiber nanoelectrode arrays: electrochemical etching and electrode reusability
Source: Royal Society of Chemistry journal article supplement (doi:10.1039/c4ra01779j), 2014-01-01
Supplement: c4ra01779j1.pdf [file c4ra01779j1.pdf]

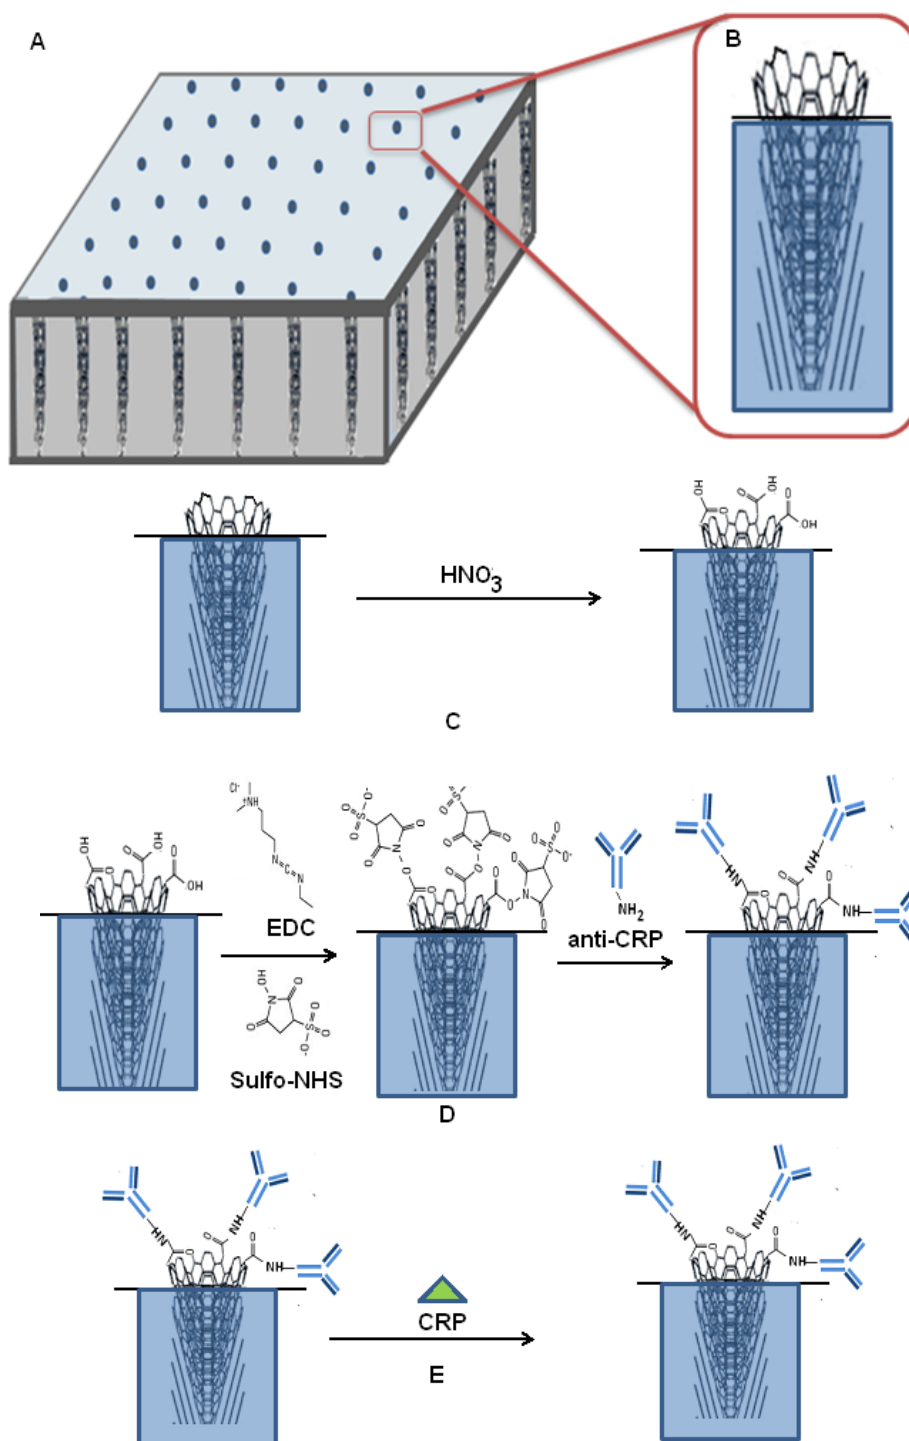

Fig. S1. Schematic of the electrode surface modification. (A) 3 D schematic of the working electrode, (B) embedded VACNF tip, (C) formation of -COOH groups after  $\text{HNO}_3$  treatment, D) linker (EDC, Sulfo-NHS) binding and anti-CRP probe immobilization and E) CRP target binding with anti-CRP immobilized on VACNFs tips.

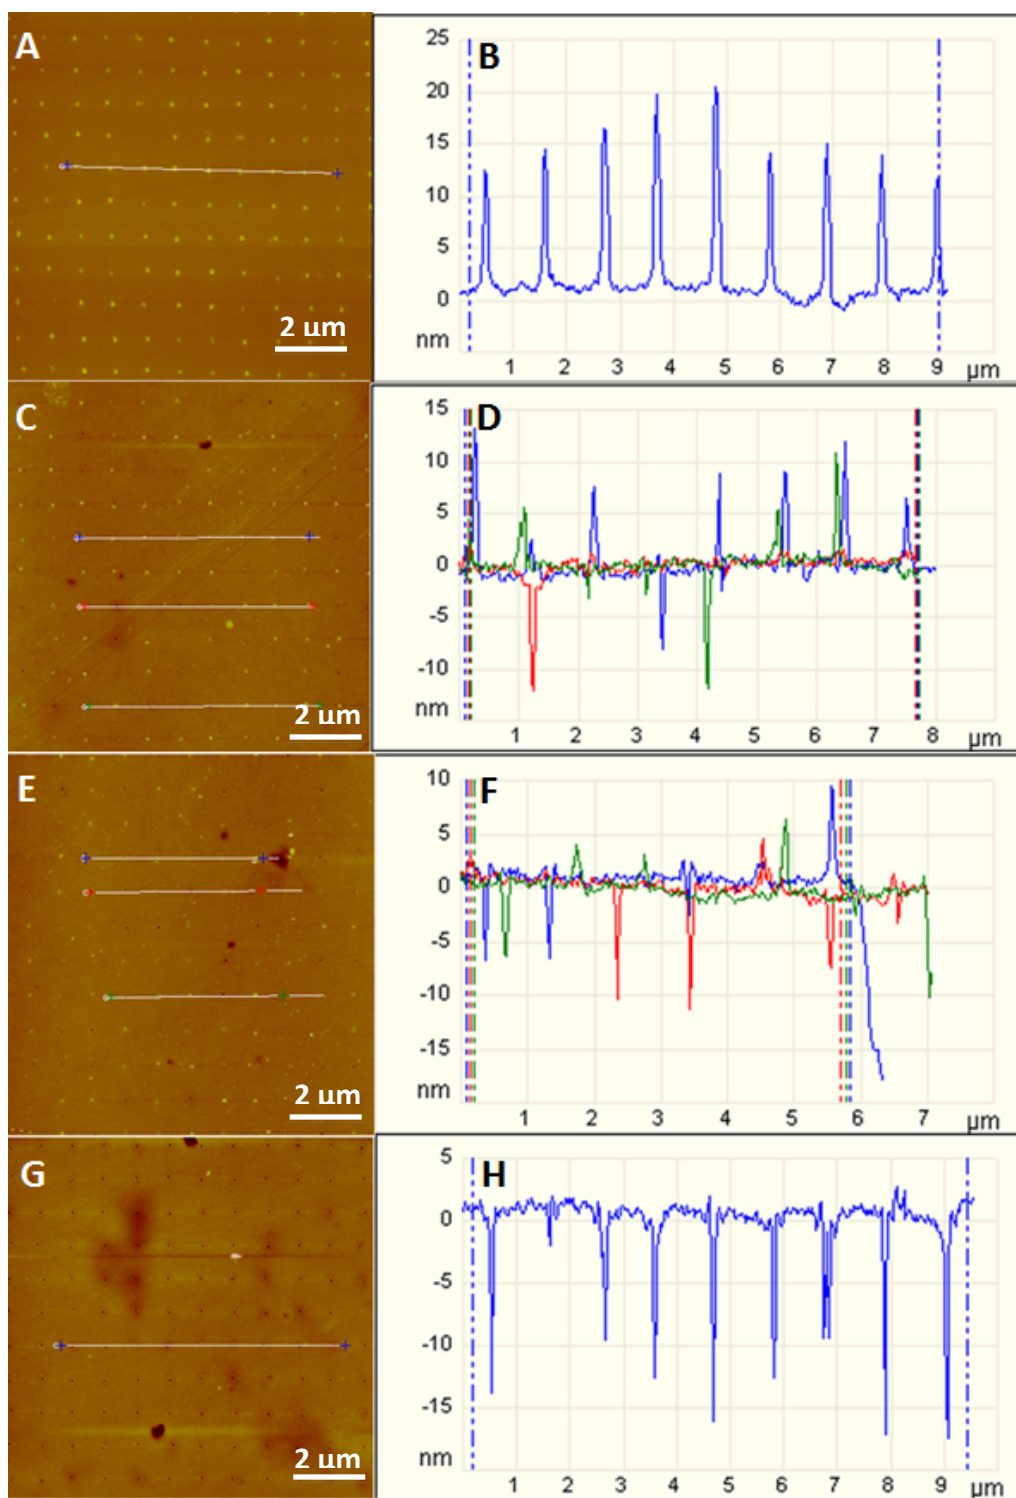

Fig. S2 2-D AFM (A,C,E,G) images and 2-D graphs (topographical profile) (B,D,F,H) obtained by drawing three lines (Blue, Red and Green) cross sections on 2-D images (A,C,E,G) of VACNF electrodes scanned after different durations of ECE performed in an aqueous solution of 1 M NaOH at 1.5 V. (A and B) 5.0 s, (C and D) 12.5 s, (E and F) 15.0 s and (G and H) 20.0 s respectively.

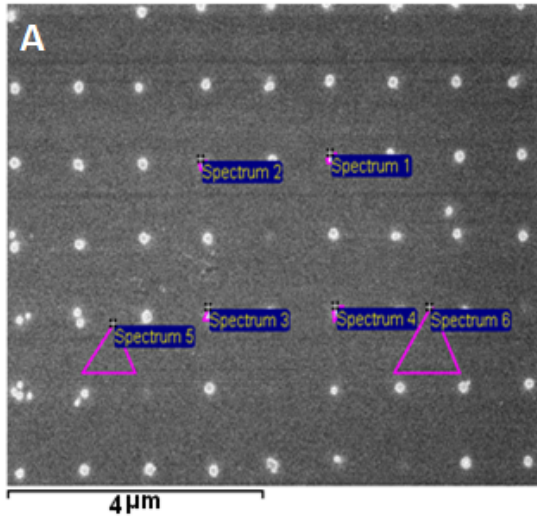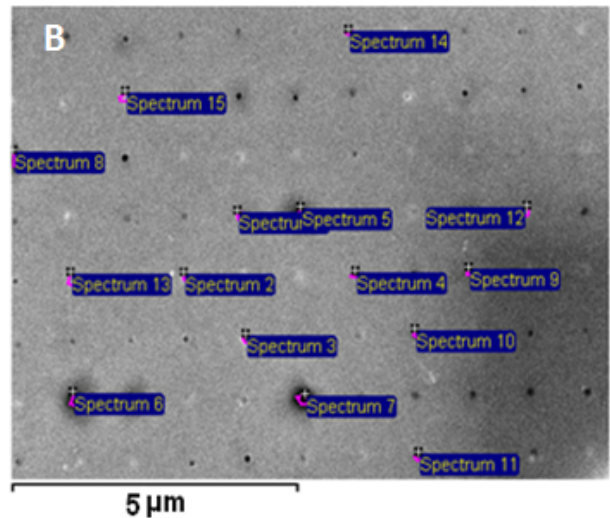

**Table 1. List of Elements (Normalized)**

| Spectrum   | In stats. | C     | O     | Si    | Cr    | Total  |
|------------|-----------|-------|-------|-------|-------|--------|
| Spectrum 1 | Yes       | 15.20 | 28.97 | 22.96 | 32.87 | 100.00 |
| Spectrum 2 | Yes       | 13.52 | 28.60 | 23.29 | 34.59 | 100.00 |
| Spectrum 3 | Yes       | 13.20 | 29.43 | 23.90 | 33.48 | 100.00 |
| Spectrum 4 | Yes       | 13.94 | 31.34 | 22.82 | 31.91 | 100.00 |
| Spectrum 5 | Yes       |       | 29.19 | 28.84 | 41.97 | 100.00 |
| Spectrum 6 | Yes       |       | 32.02 | 29.44 | 38.54 | 100.00 |
| Max.       |           | 15.20 | 32.02 | 29.44 | 41.97 |        |
| Min.       |           | 13.20 | 28.60 | 22.82 | 31.91 |        |

**Table 2. List of Elements (Normalized)**

| Spectrum    | In stats. | C    | O     | Si    | Cr    | Total  |
|-------------|-----------|------|-------|-------|-------|--------|
| Spectrum 1  | Yes       |      | 28.90 | 39.42 | 31.67 | 100.00 |
| Spectrum 2  | Yes       |      | 30.38 | 30.74 | 38.88 | 100.00 |
| Spectrum 3  | Yes       |      | 29.90 | 29.79 | 40.32 | 100.00 |
| Spectrum 4  | Yes       | 6.21 | 31.09 | 26.89 | 35.81 | 100.00 |
| Spectrum 5  | Yes       |      | 30.23 | 30.96 | 38.81 | 100.00 |
| Spectrum 6  | Yes       | 5.54 | 32.25 | 29.60 | 32.62 | 100.00 |
| Spectrum 7  | Yes       |      | 31.00 | 30.35 | 38.66 | 100.00 |
| Spectrum 8  | Yes       |      | 30.83 | 31.20 | 37.97 | 100.00 |
| Spectrum 9  | Yes       | 8.19 | 29.18 | 25.83 | 36.80 | 100.00 |
| Spectrum 10 | Yes       | 7.33 | 30.07 | 26.27 | 36.33 | 100.00 |
| Spectrum 11 | Yes       | 8.17 | 31.12 | 25.81 | 34.90 | 100.00 |
| Spectrum 12 | Yes       | 6.81 | 30.27 | 27.03 | 35.90 | 100.00 |
| Spectrum 13 | Yes       | 6.36 | 30.87 | 26.62 | 36.15 | 100.00 |
| Spectrum 14 | Yes       | 5.01 | 29.92 | 28.05 | 37.02 | 100.00 |
| Spectrum 15 | Yes       | 6.18 | 29.67 | 28.39 | 35.76 | 100.00 |
| Max.        |           | 8.19 | 32.25 | 39.42 | 40.32 |        |
| Min.        |           | 5.01 | 28.90 | 25.81 | 31.67 |        |

Fig. S3 SEM images with different regions marked as spectrum and tables for quantitative %w values of constituent material components from different spectrums. (A and B) SEM images of un-etched and etched in 1 M NaOH at 1.5 Volts for 17.5 s. (C) Table 1 and (D) Table 2 list of the %w of constituent components explored by EDS at different regions (spectrums) of SEM image (A and B).

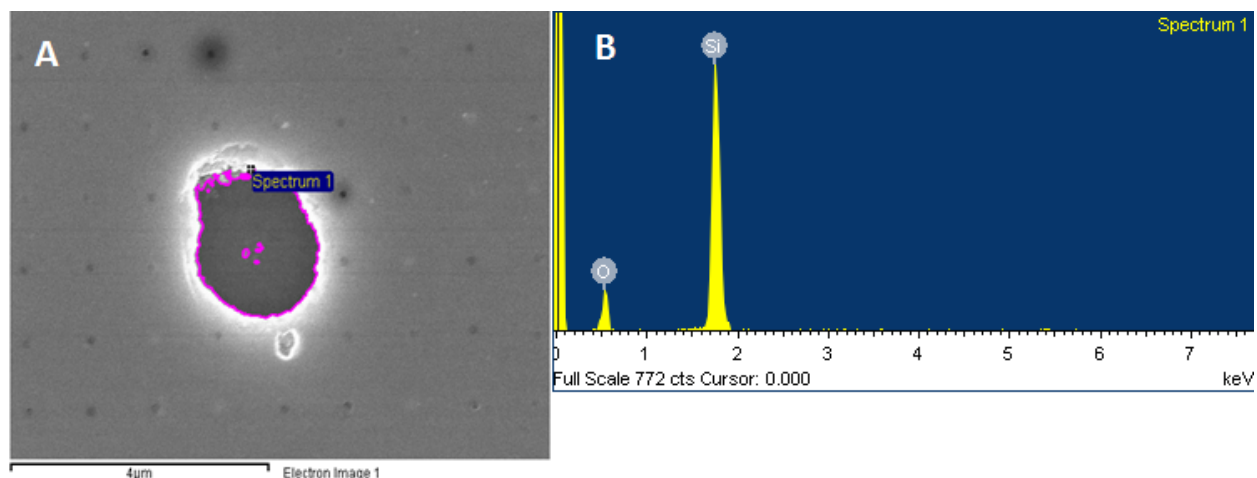

**Table 3 List of Elements (normalized)**

| Element | Weight% | Atomic% |
|---------|---------|---------|
| O K     | 34.40   | 47.94   |
| Si K    | 65.60   | 52.06   |
| Totals  | 100.00  |         |

Fig. S4 SEM images of excessively etched VACNF electrode in 1 M NaOH at 1.5 V for 22.0 s. (A) SEM image representing oxide etching region (Spectrum1) in a VACNF electrode cross section, (B) EDS spectrum for the region under study showing peaks for Si and onle as Cr and C are etched away due to excessive etching. Table 3 lists the %w of consitituent components explored by EDS for spectrum1.
